# Supplementary material for: Direct imaging of light-element impurities in graphene reveals triple-coordinated oxygen
Source: PubMed Central journal article supplement (PMC6783479; doi:10.1038/s41467-019-12537-3), 2019-10-08
Supplement: 41467_2019_12537_MOESM3_ESM.pdf [file 41467_2019_12537_MOESM3_ESM.pdf]

## Description of Additional Supplementary Files

File Name: Supplementary Movie 1

Description: **Reduction of oxygen in graphene oxide**

The video shows a sequence of (false color) STEM images, which reveals the electron beam-induced reduction of oxygen in graphene oxide. Initially, an oxygen pair configuration is present, identified by the two brighter atoms. After several frames, the first oxygen atom gets sputtered leaving a monovacancy, which shows the dynamics as discussed in the manuscript. Then, the second oxygen atom gets kicked out leaving a divacancy.
